# Supplementary material
Source: Springer Nature journal article supplement (https://www.springermedizin.de/resource/supplementary/12865_2008_237_MOESM2_ESM.pdf/9427578)
Supplement: MOESM2 [file 9427578]

plasmotocytes

nonparasitized

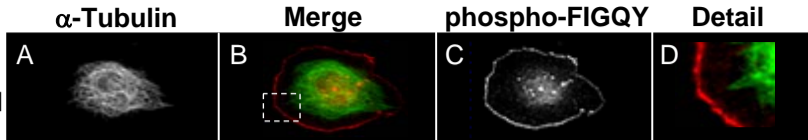

parasitized

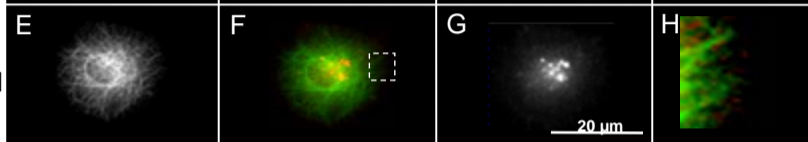

lamellocytes

nonparasitized

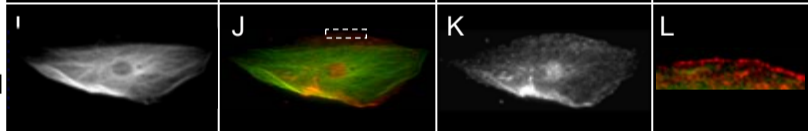

parasitized

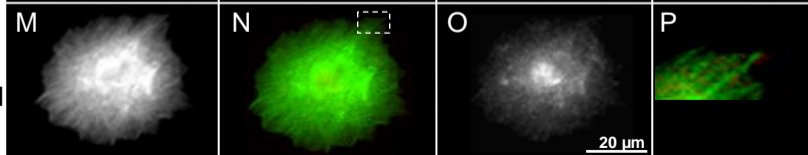

Red = phospho-Nrg Green =  $\alpha$ -Tubulin
